# Supplementary material for: A High-throughput Method for Fingerprinting of Rhizobial Free Fatty Acids by the Combination of a Thin Film Chemical Deposition Technique and Matrix-assisted Laser Desorption/ionization Time-of Flight Mass Spectrometry
Source: Preprints.org preprint supplement (doi:10.20944/preprints202001.0139.v1), 2020-01-13

## Bacteria\_AutoXecute\_water-hexane\_normalization by 421.17

Experiment Name: Bacteria\_AutoXecute\_water

### Experiment Design

| Group      | Rhizobium leguminosarum bv. viciae RCAM1026 | Sinorhizobium meliloti RCAM1021 |
|------------|---------------------------------------------|---------------------------------|
| Replicates | 4                                           | 4                               |

| Spectra               | Sample                                        | Group                                       |
|-----------------------|-----------------------------------------------|---------------------------------------------|
| Rh.leg.RCAM2016_1-1-1 | Rhizobium leguminosarum bv. viciae RCAM1026_1 | Rhizobium leguminosarum bv. viciae RCAM1026 |
| Rh.leg.RCAM2016_1-1-2 | Rhizobium leguminosarum bv. viciae RCAM1026_1 | Rhizobium leguminosarum bv. viciae RCAM1026 |
| Rh.leg.RCAM2016_1-1-3 | Rhizobium leguminosarum bv. viciae RCAM1026_1 | Rhizobium leguminosarum bv. viciae RCAM1026 |
| Rh.leg.RCAM2016_1-2-1 | Rhizobium leguminosarum bv. viciae RCAM1026_1 | Rhizobium leguminosarum bv. viciae RCAM1026 |
| Rh.leg.RCAM2016_1-2-2 | Rhizobium leguminosarum bv. viciae RCAM1026_1 | Rhizobium leguminosarum bv. viciae RCAM1026 |
| Rh.leg.RCAM2016_1-2-3 | Rhizobium leguminosarum bv. viciae RCAM1026_1 | Rhizobium leguminosarum bv. viciae RCAM1026 |
| Rh.leg.RCAM2016_1-3-1 | Rhizobium leguminosarum bv. viciae RCAM1026_1 | Rhizobium leguminosarum bv. viciae RCAM1026 |
| Rh.leg.RCAM2016_1-3-2 | Rhizobium leguminosarum bv. viciae RCAM1026_1 | Rhizobium leguminosarum bv. viciae RCAM1026 |
| Rh.leg.RCAM2016_1-3-3 | Rhizobium leguminosarum bv. viciae RCAM1026_1 | Rhizobium leguminosarum bv. viciae RCAM1026 |
| Rh.leg.RCAM2016_2-1-1 | Rhizobium leguminosarum bv. viciae RCAM1026_2 | Rhizobium leguminosarum bv. viciae RCAM1026 |
| Rh.leg.RCAM2016_2-1-2 | Rhizobium leguminosarum bv. viciae RCAM1026_2 | Rhizobium leguminosarum bv. viciae RCAM1026 |
| Rh.leg.RCAM2016_2-1-3 | Rhizobium leguminosarum bv. viciae RCAM1026_2 | Rhizobium leguminosarum bv. viciae RCAM1026 |
| Rh.leg.RCAM2016_2-2-1 | Rhizobium leguminosarum bv. viciae RCAM1026_2 | Rhizobium leguminosarum bv. viciae RCAM1026 |
| Rh.leg.RCAM2016_2-2-2 | Rhizobium leguminosarum bv. viciae RCAM1026_2 | Rhizobium leguminosarum bv. viciae RCAM1026 |
| Rh.leg.RCAM2016_2-2-3 | Rhizobium leguminosarum bv. viciae RCAM1026_2 | Rhizobium leguminosarum bv. viciae RCAM1026 |
| Rh.leg.RCAM2016_2-3-1 | Rhizobium leguminosarum bv. viciae RCAM1026_2 | Rhizobium leguminosarum bv. viciae RCAM1026 |
| Rh.leg.RCAM2016_2-3-2 | Rhizobium leguminosarum bv. viciae RCAM1026_2 | Rhizobium leguminosarum bv. viciae RCAM1026 |
| Rh.leg.RCAM2016_2-3-3 | Rhizobium leguminosarum bv. viciae RCAM1026_2 | Rhizobium leguminosarum bv. viciae RCAM1026 |
| Rh.leg.RCAM2016_3-1-1 | Rhizobium leguminosarum bv. viciae RCAM1026_3 | Rhizobium leguminosarum bv. viciae RCAM1026 |
| Rh.leg.RCAM2016_3-1-2 | Rhizobium leguminosarum bv. viciae RCAM1026_3 | Rhizobium leguminosarum bv. viciae RCAM1026 |
| Rh.leg.RCAM2016_3-1-3 | Rhizobium leguminosarum bv. viciae RCAM1026_3 | Rhizobium leguminosarum bv. viciae RCAM1026 |
| Rh.leg.RCAM2016_3-2-1 | Rhizobium leguminosarum bv. viciae RCAM1026_3 | Rhizobium leguminosarum bv. viciae RCAM1026 |
| Rh.leg.RCAM2016_3-2-2 | Rhizobium leguminosarum bv. viciae RCAM1026_3 | Rhizobium leguminosarum bv. viciae RCAM1026 |
| Rh.leg.RCAM2016_3-2-3 | Rhizobium leguminosarum bv. viciae RCAM1026_3 | Rhizobium leguminosarum bv. viciae RCAM1026 |
| Rh.leg.RCAM2016_3-3-1 | Rhizobium leguminosarum bv. viciae RCAM1026_3 | Rhizobium leguminosarum bv. viciae RCAM1026 |
| Rh.leg.RCAM2016_3-3-2 | Rhizobium leguminosarum bv. viciae RCAM1026_3 | Rhizobium leguminosarum bv. viciae RCAM1026 |

[illegible]

### Statistics Measurement: Normalized Peak Height

Normalization Method: Single Peak Height 421.17 m/z

## Peaks

| #  | m/z    | Fold | Anova (p) | Tags |
|----|--------|------|-----------|------|
| 3  | 363.10 | 1.09 | 0.015     |      |
| 4  | 365.11 | 1.17 | 7.55E-05  |      |
| 10 | 377.11 | 1.10 | 0.0275    |      |
| 12 | 379.12 | 1.14 | 0.00342   |      |
| 23 | 391.12 | 1.06 | 0.00172   |      |
| 25 | 393.14 | 1.00 | 1         |      |
| 43 | 417.14 | 1.04 | 0.173     |      |
| 47 | 419.15 | 1.04 | 0.187     |      |
| 50 | 421.17 | 1.00 | 1         |      |

## Peaks : Average Normalized Peak Heights

| #  | Rhizobium leguminosarum<br>bv. viciae<br>RCAM1026 | Sinorhizobium meliloti<br>RCAM1021 |
|----|---------------------------------------------------|------------------------------------|
| 3  | 1387.725                                          | 1516.819                           |
| 4  | 4651.020                                          | 5425.327                           |
| 10 | 2067.367                                          | 2276.266                           |
| 12 | 7042.831                                          | 8008.104                           |
| 23 | 2.596e+004                                        | 2.760e+004                         |
| 25 | 4.136e+004                                        | 4.143e+004                         |
| 43 | 2.745e+004                                        | 2.634e+004                         |
| 47 | 8.030e+004                                        | 7.737e+004                         |
| 50 | 1.274e+005                                        | 1.274e+005                         |

## Identifier 3: m/z 363.10

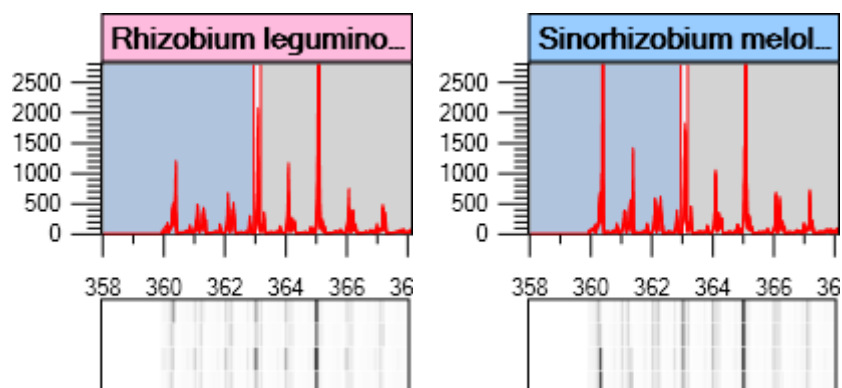

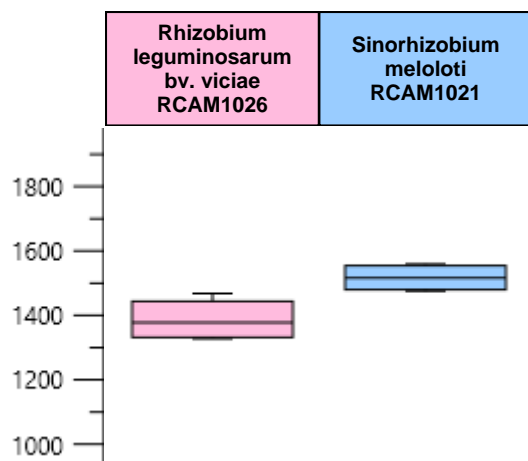**Identifier 4: m/z 365.11**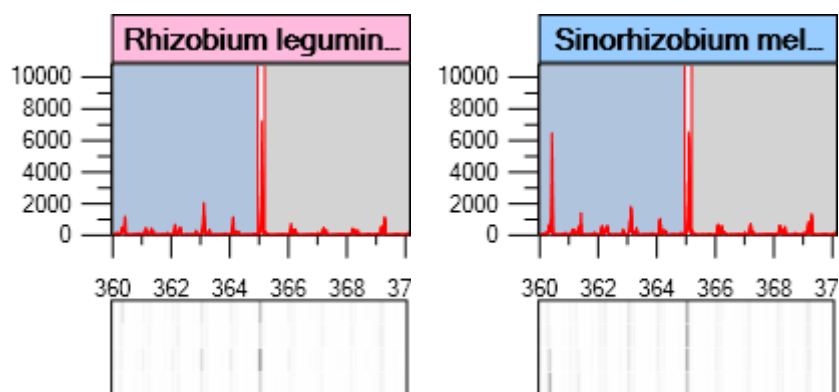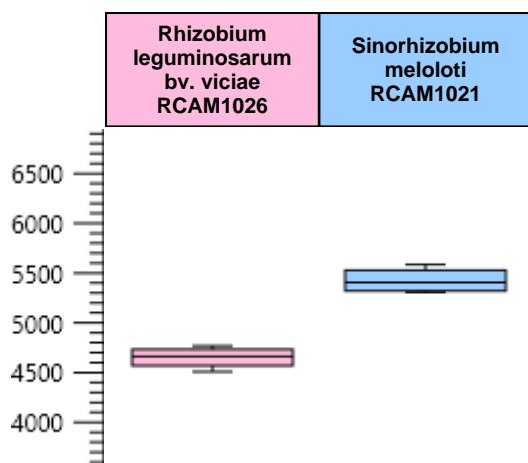

## Identifier 10: m/z 377.11

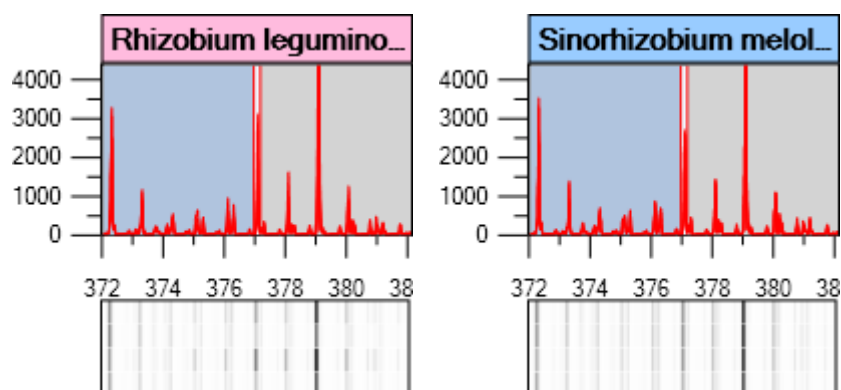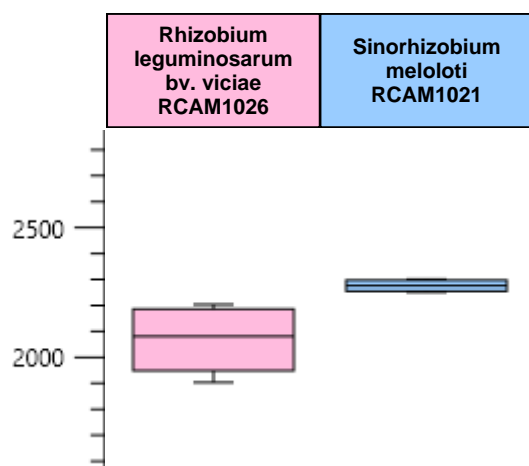

## Identifier 12: m/z 379.12

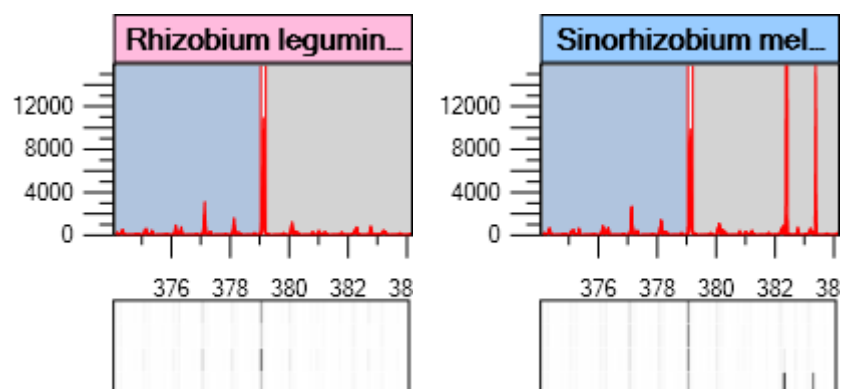

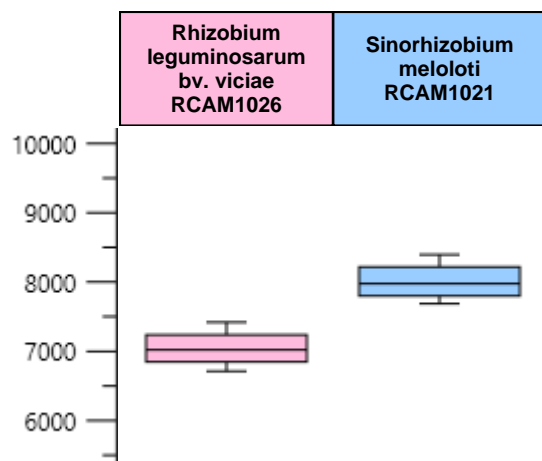**Identifier 23: m/z 391.12**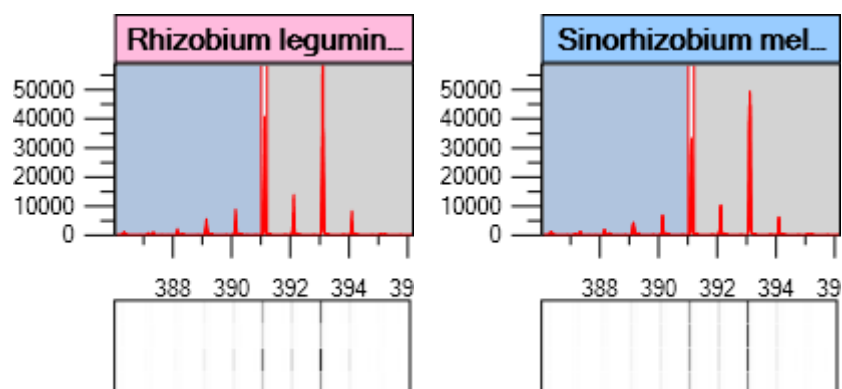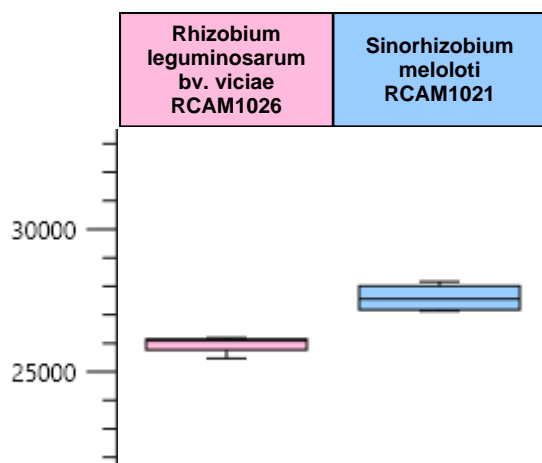

**Identifier 25: m/z 393.14**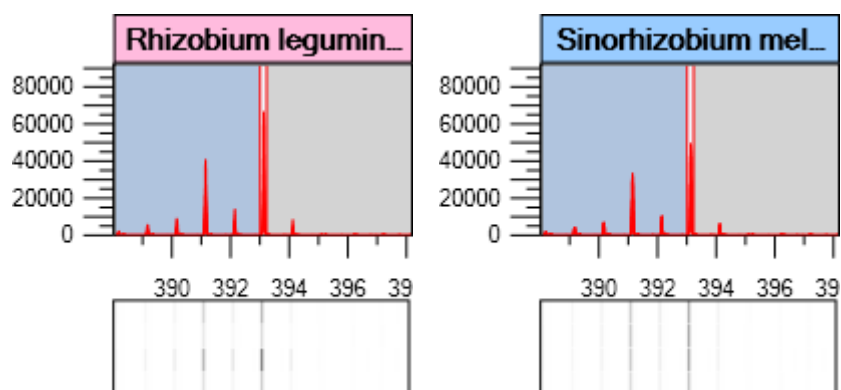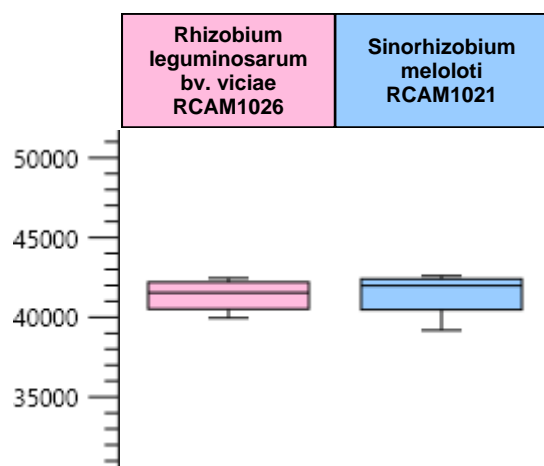**Identifier 43: m/z 417.14**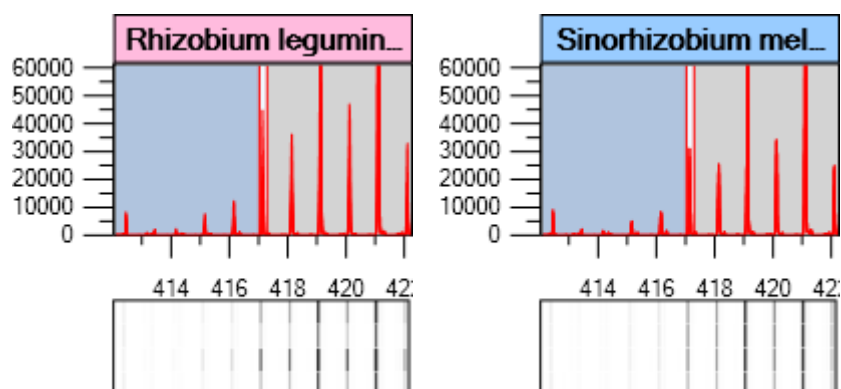

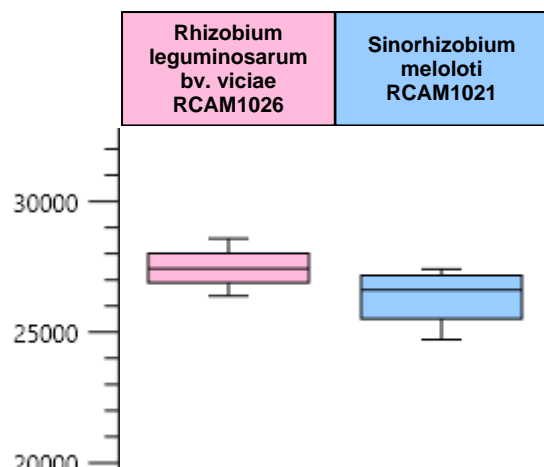

Identifier 47: m/z 419.15

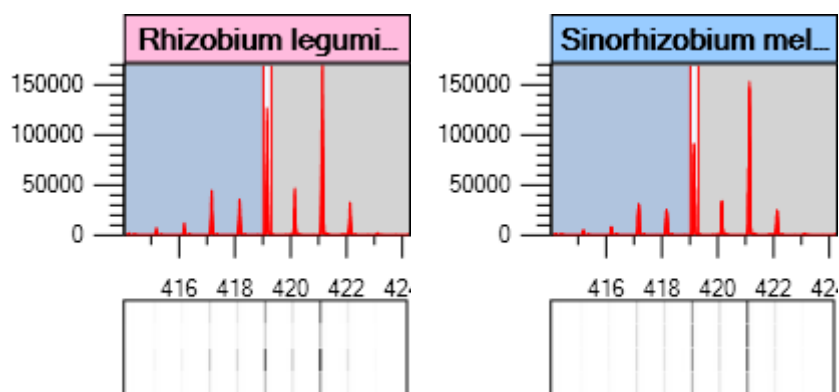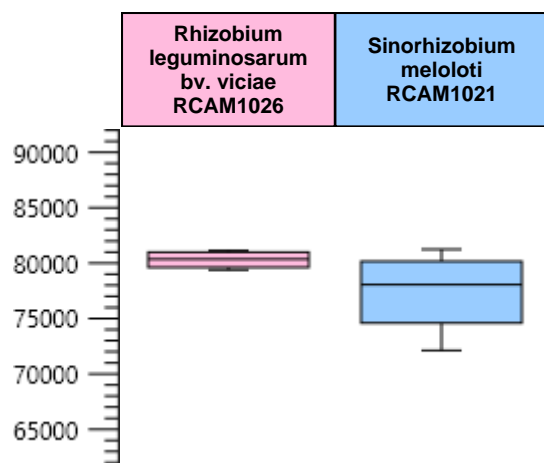



## Identifier 50: m/z 421.17

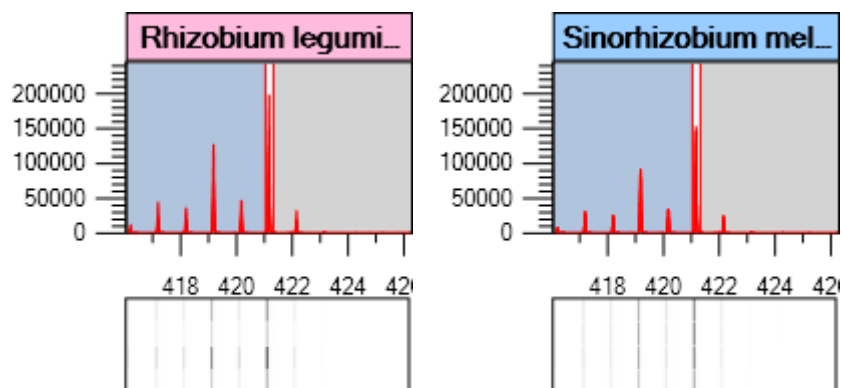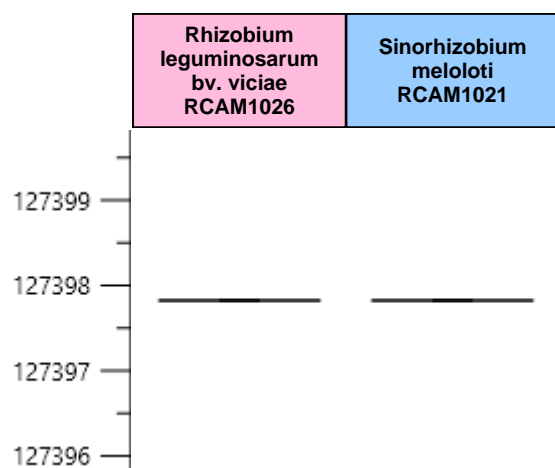

Supplement: Supplementary file 1 [file supplementary]
