# Supplementary material for: A High-throughput Method for Fingerprinting of Rhizobial Free Fatty Acids by the Combination of a Thin Film Chemical Deposition Technique and Matrix-assisted Laser Desorption/ionization Time-of Flight Mass Spectrometry
Source: Preprints.org preprint supplement (doi:10.20944/preprints202001.0139.v1), 2020-01-13

## Bacteria\_Autoexecute\_hexane\_normalization by 421.17

Experiment Name: Bacteria\_Autoexecute\_hexane

### Experiment Design

| Group      | Rhizobium leguminosarum bv. viciae RCAM1026 | Sinorhizobium meliloti RCAM1021 |
|------------|---------------------------------------------|---------------------------------|
| Replicates | 4                                           | 4                               |

| Spectra               | Sample                                        | Group                                       |
|-----------------------|-----------------------------------------------|---------------------------------------------|
| Rh.leg.RCAM2016_1-1-1 | Rhizobium leguminosarum bv. viciae RCAM1026_1 | Rhizobium leguminosarum bv. viciae RCAM1026 |
| Rh.leg.RCAM2016_1-1-2 | Rhizobium leguminosarum bv. viciae RCAM1026_1 | Rhizobium leguminosarum bv. viciae RCAM1026 |
| Rh.leg.RCAM2016_1-1-3 | Rhizobium leguminosarum bv. viciae RCAM1026_1 | Rhizobium leguminosarum bv. viciae RCAM1026 |
| Rh.leg.RCAM2016_1-2-1 | Rhizobium leguminosarum bv. viciae RCAM1026_1 | Rhizobium leguminosarum bv. viciae RCAM1026 |
| Rh.leg.RCAM2016_1-2-2 | Rhizobium leguminosarum bv. viciae RCAM1026_1 | Rhizobium leguminosarum bv. viciae RCAM1026 |
| Rh.leg.RCAM2016_1-2-3 | Rhizobium leguminosarum bv. viciae RCAM1026_1 | Rhizobium leguminosarum bv. viciae RCAM1026 |
| Rh.leg.RCAM2016_1-3-1 | Rhizobium leguminosarum bv. viciae RCAM1026_1 | Rhizobium leguminosarum bv. viciae RCAM1026 |
| Rh.leg.RCAM2016_1-3-2 | Rhizobium leguminosarum bv. viciae RCAM1026_1 | Rhizobium leguminosarum bv. viciae RCAM1026 |
| Rh.leg.RCAM2016_1-3-3 | Rhizobium leguminosarum bv. viciae RCAM1026_1 | Rhizobium leguminosarum bv. viciae RCAM1026 |
| Rh.leg.RCAM2016_2-1-1 | Rhizobium leguminosarum bv. viciae RCAM1026_2 | Rhizobium leguminosarum bv. viciae RCAM1026 |
| Rh.leg.RCAM2016_2-1-2 | Rhizobium leguminosarum bv. viciae RCAM1026_2 | Rhizobium leguminosarum bv. viciae RCAM1026 |
| Rh.leg.RCAM2016_2-1-3 | Rhizobium leguminosarum bv. viciae RCAM1026_2 | Rhizobium leguminosarum bv. viciae RCAM1026 |
| Rh.leg.RCAM2016_2-2-1 | Rhizobium leguminosarum bv. viciae RCAM1026_2 | Rhizobium leguminosarum bv. viciae RCAM1026 |
| Rh.leg.RCAM2016_2-2-2 | Rhizobium leguminosarum bv. viciae RCAM1026_2 | Rhizobium leguminosarum bv. viciae RCAM1026 |
| Rh.leg.RCAM2016_2-2-3 | Rhizobium leguminosarum bv. viciae RCAM1026_2 | Rhizobium leguminosarum bv. viciae RCAM1026 |
| Rh.leg.RCAM2016_2-3-1 | Rhizobium leguminosarum bv. viciae RCAM1026_2 | Rhizobium leguminosarum bv. viciae RCAM1026 |
| Rh.leg.RCAM2016_2-3-2 | Rhizobium leguminosarum bv. viciae RCAM1026_2 | Rhizobium leguminosarum bv. viciae RCAM1026 |
| Rh.leg.RCAM2016_2-3-3 | Rhizobium leguminosarum bv. viciae RCAM1026_2 | Rhizobium leguminosarum bv. viciae RCAM1026 |
| Rh.leg.RCAM2016_3-1-1 | Rhizobium leguminosarum bv. viciae RCAM1026_3 | Rhizobium leguminosarum bv. viciae RCAM1026 |
| Rh.leg.RCAM2016_3-1-2 | Rhizobium leguminosarum bv. viciae RCAM1026_3 | Rhizobium leguminosarum bv. viciae RCAM1026 |
| Rh.leg.RCAM2016_3-1-3 | Rhizobium leguminosarum bv. viciae RCAM1026_3 | Rhizobium leguminosarum bv. viciae RCAM1026 |
| Rh.leg.RCAM2016_3-2-1 | Rhizobium leguminosarum bv. viciae RCAM1026_3 | Rhizobium leguminosarum bv. viciae RCAM1026 |
| Rh.leg.RCAM2016_3-2-2 | Rhizobium leguminosarum bv. viciae RCAM1026_3 | Rhizobium leguminosarum bv. viciae RCAM1026 |
| Rh.leg.RCAM2016_3-2-3 | Rhizobium leguminosarum bv. viciae RCAM1026_3 | Rhizobium leguminosarum bv. viciae RCAM1026 |
| Rh.leg.RCAM2016_3-3-1 | Rhizobium leguminosarum bv. viciae RCAM1026_3 | Rhizobium leguminosarum bv. viciae RCAM1026 |
| Rh.leg.RCAM2016_3-3-2 | Rhizobium leguminosarum bv. viciae RCAM1026_3 | Rhizobium leguminosarum bv. viciae RCAM1026 |

Statistics Measurement: Normalized Peak Height

Normalization Method: Single Peak Height 421.17 m/z

## Peaks

| #  | m/z    | Fold | Anova (p) | Tags |
|----|--------|------|-----------|------|
| 3  | 363.09 | 1.08 | 0.0905    |      |
| 5  | 365.11 | 1.07 | 0.133     |      |
| 13 | 377.11 | 1.13 | 0.000964  |      |
| 15 | 379.12 | 1.15 | 0.0225    |      |
| 24 | 391.12 | 1.10 | 0.0219    |      |
| 26 | 393.14 | 1.19 | 0.000927  |      |
| 45 | 417.14 | 1.19 | 0.000232  |      |
| 49 | 419.16 | 1.16 | 9.98E-06  |      |
| 51 | 421.17 | 1.00 | 1         |      |

## Peaks : Average Normalized Peak Heights

| #  | Rhizobium leguminosarum<br>bv. viciae<br>RCAM1026 | Sinorhizobium meloloti<br>RCAM1021 |
|----|---------------------------------------------------|------------------------------------|
| 3  | 806.282                                           | 744.536                            |
| 5  | 2393.779                                          | 2230.531                           |
| 13 | 1181.413                                          | 1046.856                           |
| 15 | 3749.689                                          | 3250.885                           |
| 24 | 1.528e+004                                        | 1.387e+004                         |
| 26 | 2.628e+004                                        | 2.216e+004                         |
| 45 | 1.568e+004                                        | 1.322e+004                         |
| 49 | 4.911e+004                                        | 4.236e+004                         |
| 51 | 9.700e+004                                        | 9.700e+004                         |

## Identifier 3: m/z 363.09

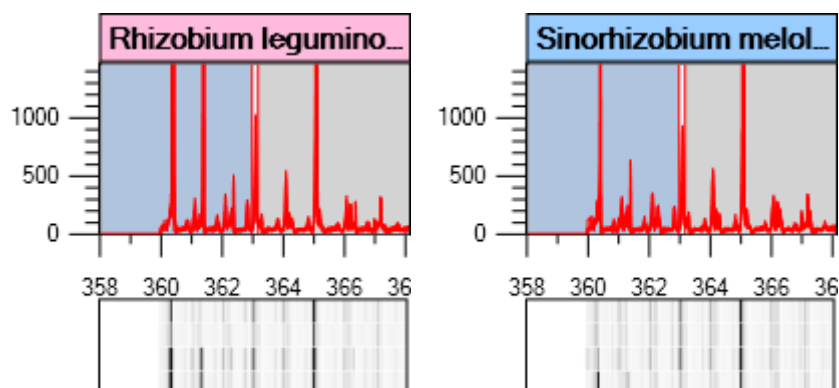

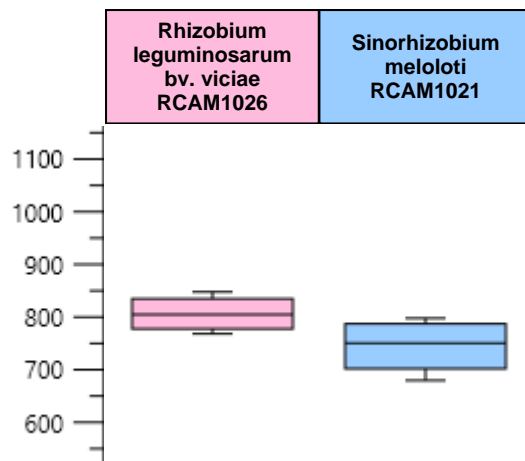**Identifier 5: m/z 365.11**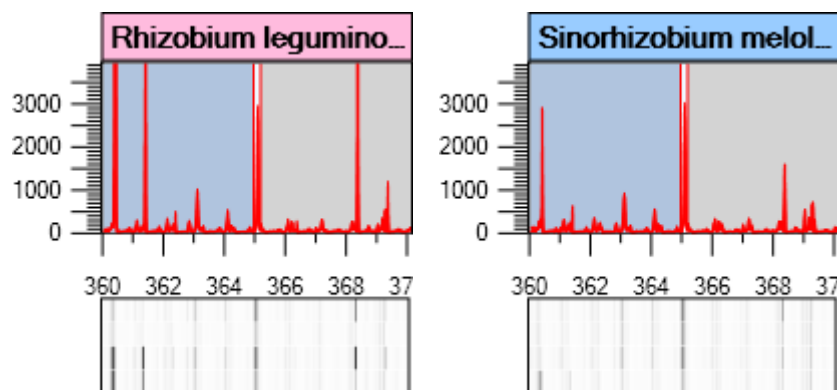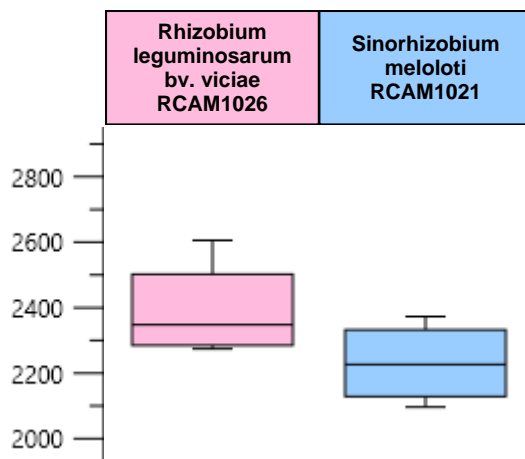

## Identifier 13: m/z 377.11

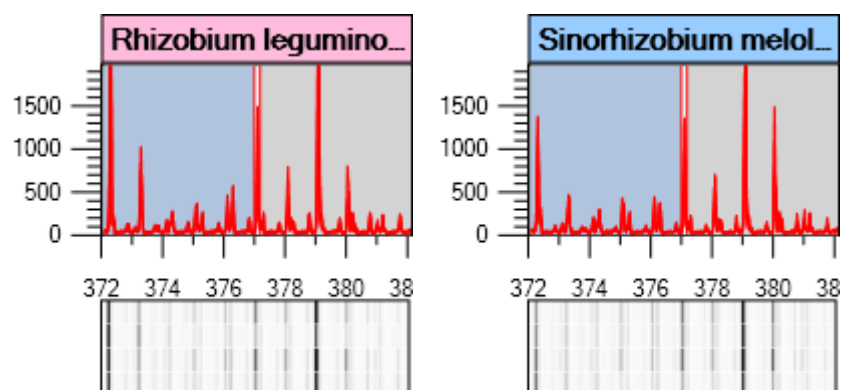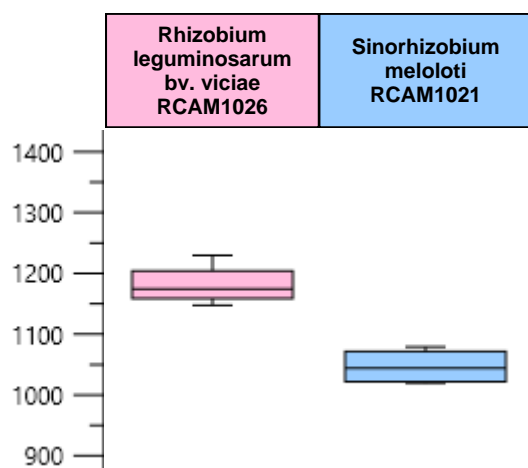

## Identifier 15: m/z 379.12

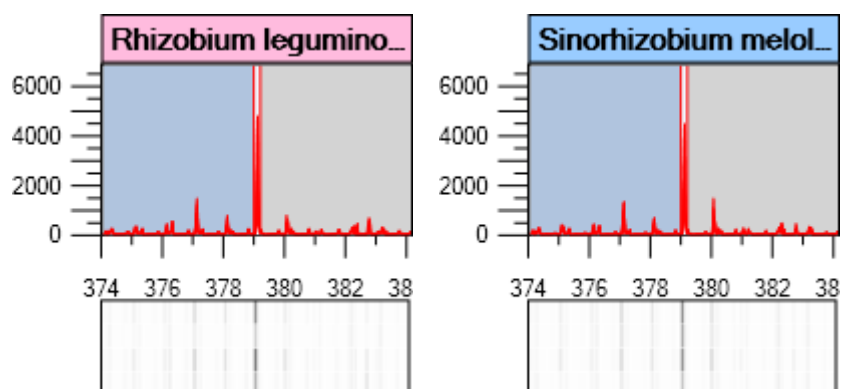

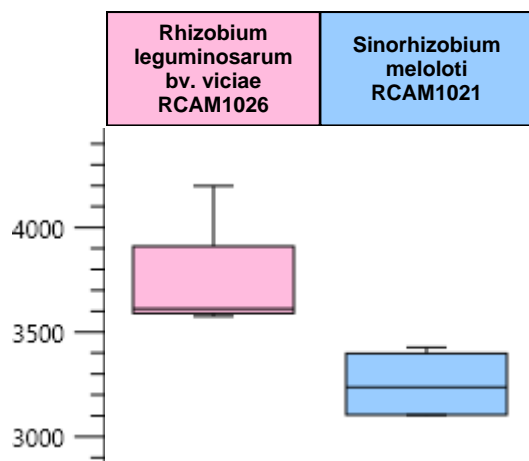

Identifier 24: m/z 391.12

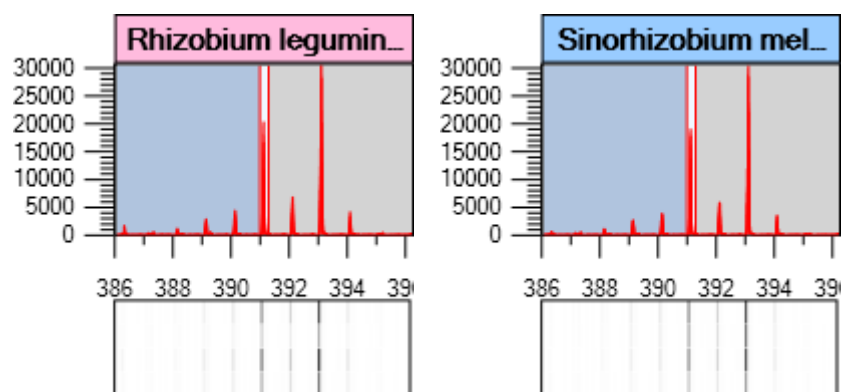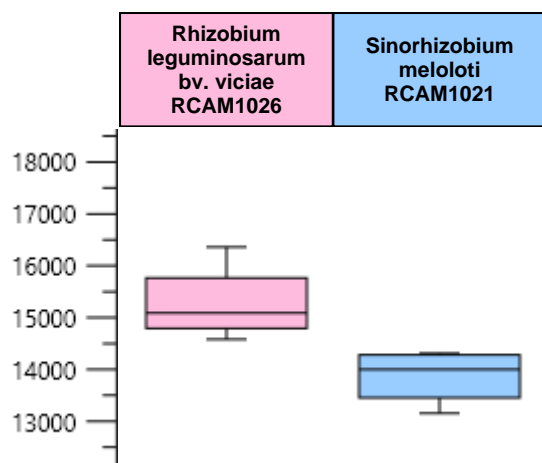

**Identifier 26: m/z 393.14**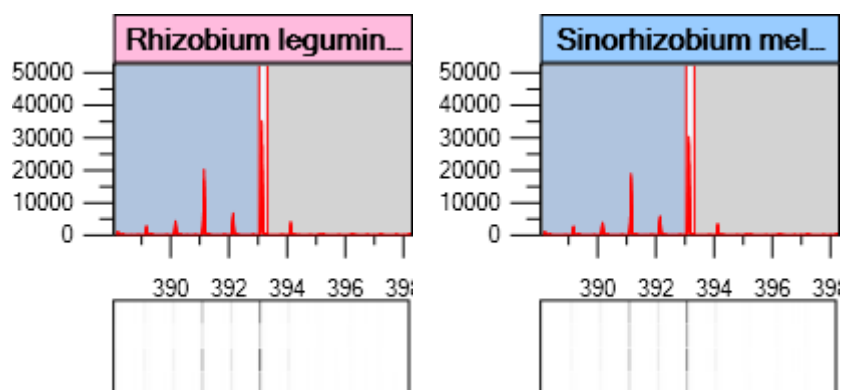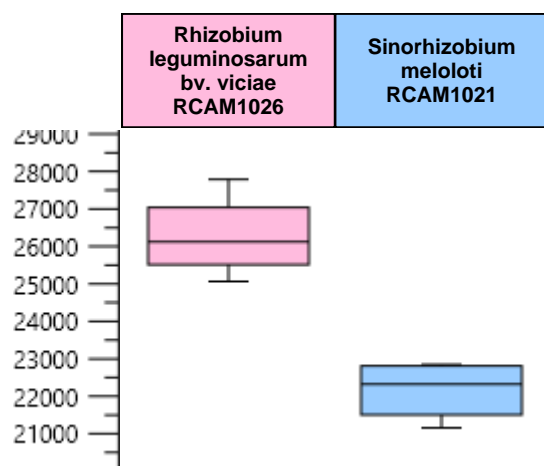**Identifier 45: m/z 417.14**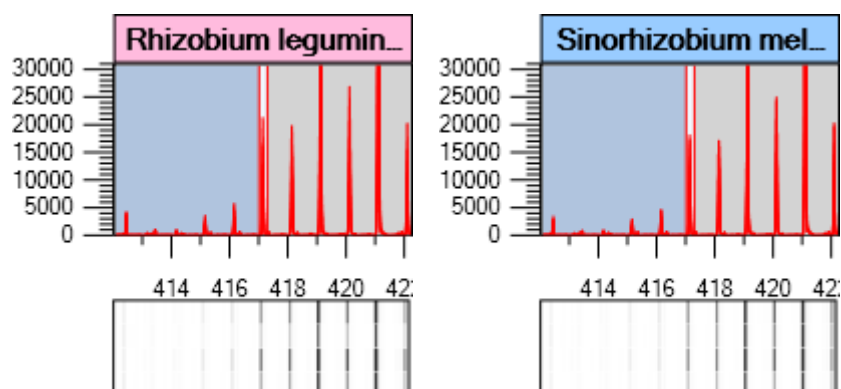

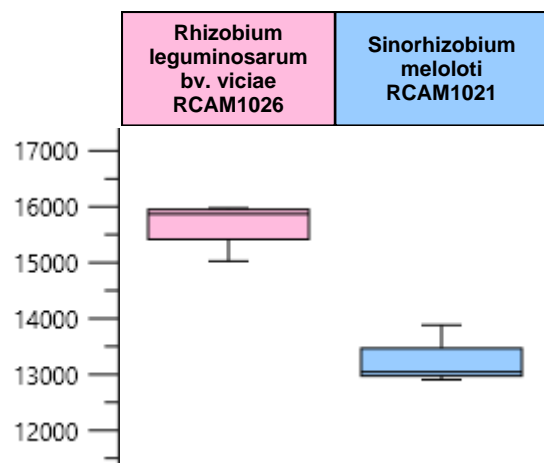

Identifier 49: m/z 419.16

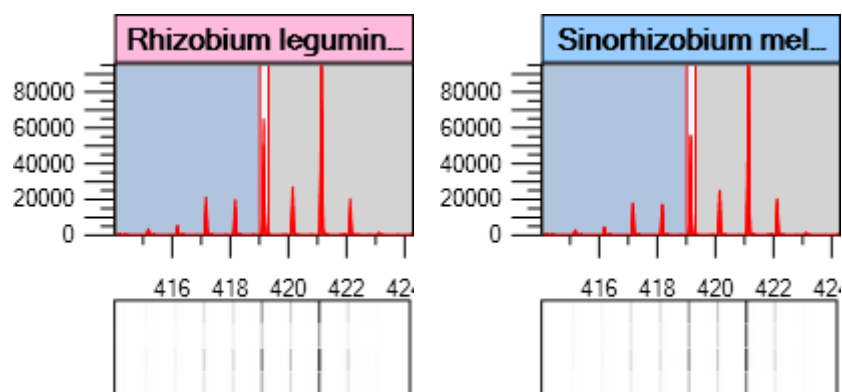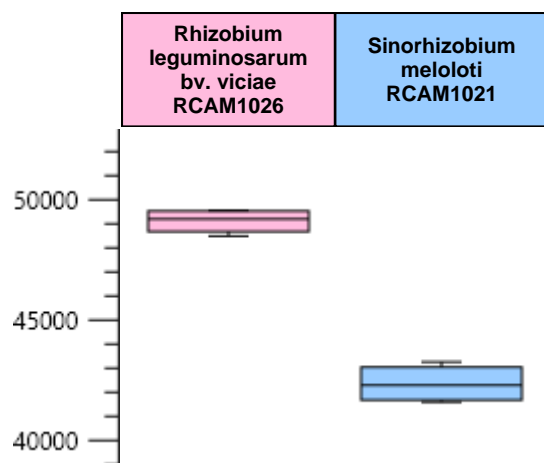



**Identifier 51: m/z 421.17**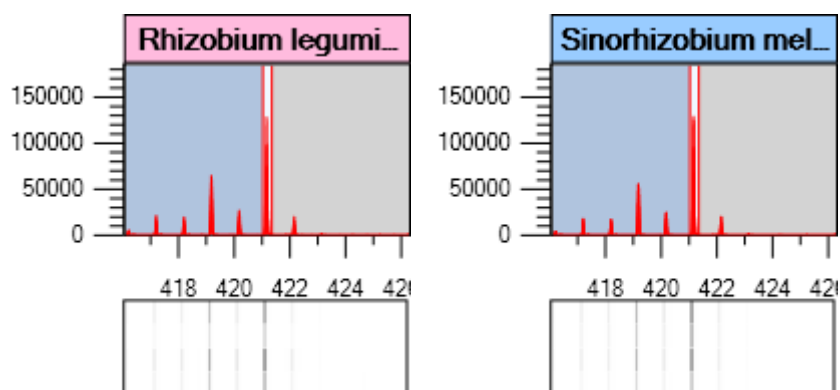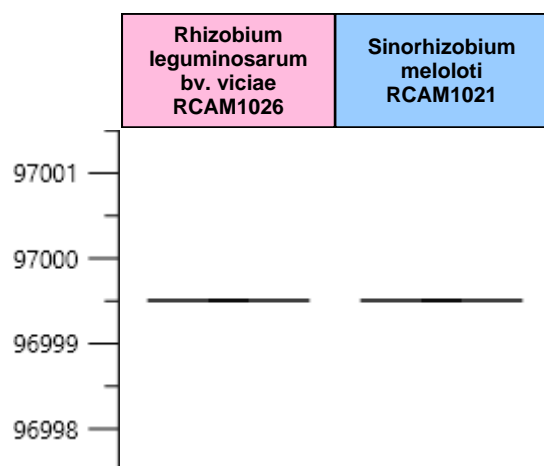

Supplement: Supplementary file 2 [file supplementary]
