# Supplementary material for: A High-throughput Method for Fingerprinting of Rhizobial Free Fatty Acids by the Combination of a Thin Film Chemical Deposition Technique and Matrix-assisted Laser Desorption/ionization Time-of Flight Mass Spectrometry
Source: Preprints.org preprint supplement (doi:10.20944/preprints202001.0139.v1), 2020-01-13
Supplement: Supplementary file 1 [file Supplementary information 1.xlsx]

## Sheet: Directory
A high-throughput method for fingerprinting of rhizobial free fatty acids by the combination of a thin film chemical deposition technique and matrix-assisted laser desorption/ionization time-of flight mass spectrometry
Aleksey Gladchuk,1§ Julia Shumilina,2,3§ Alena Kusnetsova,2§ Ksenia Bureiko,2,4Alexander Tsarev,2,3 Larisa Leonova,2 Vladimir A. Zhukov,5 Igor A. Tikhonovich,5,6 Claudia Birkemeyer,7 Ekaterina Podolskaya,1,8 and Andrej Frolov2,3*
1Institute of Toxicology , Federal Medical-Biological Agency of Russia, 2Department of Biochemistry, St. Petersburg State University, 3Department of Bioorganic Chemistry, Leibniz Institute of Plant Biochemistry, 4Department of Invertebrate Zoology, St. Petersburg State University, 5All-Russia Research Institute for Agricultural Microbiology, 6Department of Genetics and Biotechnology, St. Petersbu…
§These authors contributed equally to the manuscript
*Corresponding author: Dr. Andrej Frolov
Supporting information 1
Directory
Table S1-1 Result table, compatible with the input requirements of the MetaboAnalyst software tool, all the replicates using normalizaton by peak heights of the signals related to stearic acid (m/z 421.17)
Table S1-2 Result table, compatible with the input requirements of the MetaboAnalyst software tool, for only average peak heights within each technical replicate using normalizaton by peak heights of the signals related to stearic acid (m/z 421.17)
Table S1_3 PCA score plots of the first two principal components and heat maps for the patterns of FFAs content alterations across Rhizobium leguminosarum and Sinorhizobium meliloti samples.

## Sheet: Table S1-1
Table S1-1 Result table, compatible with the input requirements of the MetaboAnalyst software tool, all the replicates using normalizaton by peak heights of the signals related to stearic acid (m/z 421.17)
Sample	Rh.leg.RCAM2016_1-1-1	Rh.leg.RCAM2016_1-1-2	Rh.leg.RCAM2016_1-1-3	Rh.leg.RCAM2016_1-2-1	Rh.leg.RCAM2016_1-2-2	Rh.leg.RCAM2016_1-2-3	Rh.leg.RCAM2016_1-3-1	Rh.leg.RCAM2016_1-3-2	Rh.leg.RCAM2016_1-3-3	Rh.leg.RCAM2016_2-1-1	Rh.leg.RCAM2016_2-1-2	Rh.leg.RCAM2016_2-1-3	Rh.leg.RCAM2016_2-2-1	Rh.leg.RCAM2016_2-2-2	Rh.leg.RCAM2016_2-2-3	Rh.leg.RCAM2016_2-3-1	Rh.leg.RCAM2016_2-3-2	Rh.leg.RCAM2016_2-3-3	Rh.leg.RCAM2016_3-1-1	Rh.leg.RCAM2016_3-1-2	Rh.leg.RCAM2016_3-1-3	Rh.leg.RCAM2016_3-2-1	Rh.leg.RCAM2016_3-2-2	Rh.leg.RCAM2016_3-2-3	Rh.leg.RCAM2016_3-3-1	Rh.leg.RCAM2016_3-3-2	Rh.leg.RCAM2016_3-3-3	Rh.leg.RCAM2016_4-1-1	Rh.leg.RCAM2016_4-1-2	Rh.leg.RCAM2016_4-1-3	Rh.leg.RCAM2016_4-2-1	Rh.leg.RCAM2016_4-2-2	Rh.leg.RCAM2016_4-2-3	Rh.leg.RCAM2016_4-3-1	Rh.leg.RCAM2016_4-3-2	Rh.leg.RCAM2016_4-3-3	Si.mel.RCAM1021_1-1-1	Si.mel.RCAM1021_1-1-2	Si.mel.RCAM1021_1-1-3	Si.mel.RCAM1021_1-2-1	Si.mel.RCAM1021_1-2-2	Si.mel.RCAM1021_1-2-3	Si.mel.RCAM1021_1-3-1	Si.mel.RCAM1021_1-3-2	Si.mel.RCAM1021_1-3-3	Si.mel.RCAM1021_2-1-1	Si.mel.RCAM1021_2-1-2	Si.mel.RCAM1021_2-1-3	Si.mel.RCAM1021_2-2-1
Class/Name	R	R	R	R	R	R	R	R	R	R	R	R	R	R	R	R	R	R	R	R	R	R	R	R	R	R	R	R	R	R	R	R	R	R	R	R	S	S	S	S	S	S	S	S	S	S	S	S	S
363_hexane	1600.1	1647.7	1411.82	1497.22	1297.75	1044.67	1775.75	1683.56	1255.91	1694.32	1300.9	1319.79	1512.95	1433.52	924.77	1637.5	1700.73	1243.19	1708.39	1273.78	1187.41	1317.62	1327.34	1056.39	1515.46	1507.7	1130	1389.54	1423.76	1111.81	1508.73	1351.37	1090.75	1350.78	1362.94	1362.17	1686.66	1798.39	1208.56	1701.11	1627.87	1354.98	1440.15	1317.37	1143.99	1979.49	1670.3	1251.01	1608.99
365_hexane	4900.76	5097.57	4143.92	5025.39	4926.84	3522.89	5117.97	5331.61	4225.21	5159.73	4160.36	3841.78	5457.08	4678.93	3698.95	5700.59	5488.21	4723.89	5050.86	4976	3765.06	4526.56	4731.55	3927.35	5272.23	5393.19	4002.05	4638.19	4940.52	3782.59	4637.27	4492.57	3683.62	5235.08	4826.06	4354.27	5625.79	6205.68	4424.66	6715.57	6409.59	4784.03	5235.6	5626.14	4258.23	6944.66	6125.08	4593	5650.59
377_hexane	2354.94	2558.63	2150.29	2004.36	2190.49	1564.01	2487.96	2465.2	1740.99	2339.97	1895.87	1878.96	2632.08	2319.56	1833.03	2442.83	2666.27	1826.46	1912.93	2195.46	1762.89	2048.9	2181.79	1718.89	2124.91	2250.14	1752.48	1732.11	2090.23	1612.34	1978.64	1988.86	1611.98	2066.45	2071.51	1972.79	2226.81	2873.67	1923.54	2495.79	2604.45	2041.64	2149.3	2334.68	1675.15	2863.47	2541.22	1950.23	2156.75
379_hexane	7572.01	8365.99	6308.34	7438.64	8078.9	5498.58	7711.22	9001.09	6785.49	7055.06	6008.27	5301.89	7674.42	7534.12	5947.52	8006.11	9067.91	6933.62	7056.21	7497.67	6068.76	6725.28	7064.85	6058.39	7628.05	8527.26	6223.41	6346.19	7414.57	5426.35	7194.3	7501.91	5586.7	7410.33	7255.39	6267.11	7757.34	8617.41	6356.79	9254.24	9156.43	7024.02	7207.14	7893.83	5914.37	10220.8	9431.5	6956	8382.61
391_hexane	24089.9	31234.8	24186.2	24316	29669.9	22290.7	26032.2	29911.2	23242	23911.6	25972.1	23111.4	26019.3	29107.1	23030.3	27186.6	32302.2	25041.1	24801.9	29130.2	23318.7	23374.2	29182.4	23696.8	25623	31485.2	23954	23162.7	30171.1	23657.9	23939.8	28056.1	22574.4	24836.9	28595.4	24191.5	25280.7	33259.1	23180.2	28985.3	32017.9	25259.1	25082.5	29527.6	21553.8	31496.4	33221.1	25422	25951.1
393_hexane	42448.1	42785.4	34858.7	44401.1	44210.6	33370.5	49127.9	49076.5	37419.4	39437.5	37693.8	32679.4	44883.4	41226.9	34256.1	51575.3	50021.9	38138	43388.8	42887.6	35820.8	42236.8	42594.3	36007.3	50752	49400.4	38905.4	41774.2	40771.7	32368.8	43209.6	40916.1	34037.8	46653.2	42391.6	37375.1	40845.9	41835.2	32404.6	49559.1	44215	35442.4	37629.8	40314.6	30364.2	51468.4	42407.8	34518.7	45410.7
417_hexane	29287.3	29711.1	24812.2	28040.3	29282.1	22509.9	29384.2	29164.2	24413	27727.3	23954.3	21274.3	29222.5	26641.6	22792.5	29736	31144.2	24946.6	28291.9	29360.2	24262.4	29576.5	28814.1	25952.8	31504.1	32800.5	26634.5	26932.2	28577.5	23484.9	29274.5	28391.9	23119.9	31530.2	29500.8	26197.5	26002.5	27906.4	20579.2	28898.9	27940.9	21922.2	24392.9	24980.9	19766.6	32324.6	27678.6	22186	26822.9
419_hexane	83571.9	81180.8	70020.3	84290.9	85443.8	68622.1	87638.3	85153.9	72565.7	82354.9	74825.1	64837	88492.4	81197.7	68729.9	90591.1	89615.5	73768.9	83420.1	81488.3	70443.5	84058.8	81827.6	71242	91150.5	91466.8	75076.4	81197.8	82828.7	69981.3	83882.6	84481.1	71214.3	92096.1	87222.4	74901.2	74610.5	75991.2	61325.7	81070.2	79993.8	64388.3	73827.4	75802.1	62143.7	87469.9	77960.5	66216.2	83259.1
421_hexane	127398	127398	127398	127398	127398	127398	127398	127398	127398	127398	127398	127398	127398	127398	127398	127398	127398	127398	127398	127398	127398	127398	127398	127398	127398	127398	127398	127398	127398	127398	127398	127398	127398	127398	127398	127398	127398	127398	127398	127398	127398	127398	127398	127398	127398	127398	127398	127398	127398
Rh.leg.RCAM2016_1-1-1 - replicate name
R - Rhizobium leguminosarum
S - Sinorhizobium meliloti
[truncated: 23 more columns]

## Sheet: Table S1_2
Table S1-2 Result table, compatible with the input requirements of the MetaboAnalyst software tool, for only average peak heights within each technical replicate using normalizaton by peak heights of the signals related to stearic acid (m/z 421.17)
Sample	1_R	2_R	3_R	4_R	1_S	2_S	3_S	4_S
Class/Name	R	R	R	R	S	S	S	S
363_hexane	1468.28	1418.63	1336.01	1327.98	1475.45	1558.92	1483.9	1549
365_hexane	4699.13	4767.72	4627.21	4510.02	5476.14	5584.3	5307.37	5333.5
377_hexane	2168.54	2203.89	1994.27	1902.77	2258.34	2300.96	2251.32	2294.45
379_hexane	7417.81	7058.77	6983.32	6711.43	7686.84	8396.83	7910.59	8038.15
391_hexane	26108.1	26186.8	26062.9	25465.1	27127.4	28158.3	27231.1	27871.5
393_hexane	41966.5	41101.4	42443.7	39944.2	39179	42204.3	41755.2	42587.7
417_hexane	27400.5	26382.2	28577.5	27445.5	24710.1	26306	26923.8	27403.4
419_hexane	79832	79379.2	81130.5	80867.3	72128.1	77053.5	79053.9	81246
421_hexane	127398	127398	127398	127398	127398	127398	127398	127398
1_R, 2_S - name of the technical replicate
R - Rhizobium leguminosarum
S - Sinorhizobium meliloti

## Sheet: Table S1_3
Table S1_3 PCA score plots of the first two principal components and heat maps for the patterns of FFAs content alterations across Rhizobium leguminosarum and Sinorhizobium meliloti samples.
A. Normalizaton by peak heights of the signals related to palmitic acid (m/z 393.14), extraction from n-hexane lyzates
Sample	1_R	2_R	3_R	4_R	1_S	2_s	3_S	4_S
Class/Name	R	R	R	R	S	S	S	S
363_hexane	721.263	826.536	730.654	721.847	726.662	853.779	807.799	897.054
365_hexane	2284.74	2334.58	2110.4	2155.56	2452.75	2529.89	2334.29	2492.11
377_hexane	1078.11	1147.68	1066.41	1099.38	1095.36	1153.52	1135.18	1226.9
379_hexane	3679.66	3474.23	3350.7	3379.82	3599.45	3655.46	3455.64	3572.84
391_hexane	14331	14166.1	14068.9	14063.1	15249.3	15269.5	15320.1	15124.2
393_hexane	24336.3	24336.3	24336.3	24336.3	24336.3	24336.3	24336.3	24336.3
417_hexane	13957.2	14624.5	14838.7	14836.4	13802	13938.4	15457	14999.8
419_hexane	43392.6	47203.3	45433.9	46505.8	44515	44624.5	47713.3	49771.7
421_hexane	85014	94397.1	90214.7	91023.6	103803	103724	108125	111665
B. Normalizaton by peak heights of the signals related to oleic acid (m/z 419.16), extraction from n-hexane lyzates
Sample	1_R	2_R	3_R	4_R	1_S	2_s	3_S	4_S
Class/Name	R	R	R	R	S	S	S	S
363_hexane	758.419	796.22	735.243	706.812	745.919	871.326	771.066	820.918
365_hexane	2404.13	2259.35	2124.51	2114.57	2517.66	2589.89	2231.91	2283.85
377_hexane	1134.31	1110.11	1071.8	1077.68	1123.77	1178.51	1085.84	1125.23
379_hexane	3871.97	3368.6	3379.7	3322.3	3696.77	3742.56	3308.76	3277.75
391_hexane	15071.2	13747.6	14165.3	13829.8	15648.3	15634.1	14662.1	13868.5
393_hexane	25632.2	23619.4	24535.1	23935.1	25024.6	24967.2	23307.6	22324.9
417_hexane	14675.3	14139	14910.7	14552.5	14152.7	14255.3	14783.6	13749.4
419_hexane	45633	45633	45633	45633	45633	45633	45633	45633
421_hexane	89483.6	91377.8	90586.2	89395.2	106550	106090	103469	102407
C. Normalizaton by total ion current (TIC) , extraction from n-hexane lyzates
Sample	1_R	2_R	3_R	4_R	1_S	2_s	3_S	4_S
Class/Name	R	R	R	R	S	S	S	S
363_hexane	822.94	592.23	814.83	575.24	843.45	782.11	842.36	587.92
365_hexane	2621.43	1687.26	2363.78	1723.15	2865.95	2372.41	2452.55	1682.4
377_hexane	1234.19	825.78	1186.83	881.59	1284.35	1066.72	1194.94	827.33
379_hexane	4241.33	2534.02	3809.64	2736.44	4259	3456.33	3664.17	2444.34
391_hexane	16673.5	10342.3	16008.6	11474.6	18077.8	14346	16249	10567.4
393_hexane	28219	17782.1	27768.6	19783.5	28931	23005.1	25879.9	16881.6
417_hexane	16160.9	10575.8	16752.1	12110.6	16334.7	13071	16414.5	10458.6
419_hexane	50179.4	34158	51158.1	37673.5	52763.1	41835.1	50560.6	34500.8
421_hexane	98248.7	68399.2	101352	73673.8	122907	97001.1	114567	76873.7
D. Normalizaton by peak heights of the signals related to palmitic acid (m/z 393.14), extraction from aqueous lyzates
Sample	1_R	2_R	3_R	4_R	1_S	2_s	3_S	4_S
Class/Name	R	R	R	R	S	S	S	S
363_hexane	1439.04	1423.43	1294.01	1370.41	1550.81	1514.71	1460.84	1492.88
365_hexane	4609.83	4776.68	4479.19	4644.41	5740.59	5430.84	5221.86	5140.24
377_hexane	2127.84	2210.85	1938.32	1964.89	2373.13	2242.28	2218.53	2225.42
379_hexane	7268.89	7061.36	6773.18	6910.06	8066.05	8174.24	7778.78	7752.88
391_hexane	25928.3	26284.4	25297.3	26702.6	28556.1	27509.1	26787.5	27675.7
393_hexane	41102.4	41102.4	41102.4	41102.4	41102.4	41102.4	41102.4	41102.4
417_hexane	26987.6	26513.3	27770.5	28289.9	25991.2	25648.8	26569.8	26603.3
419_hexane	78645.1	79862.4	78808.2	83443	76204.3	75454.2	78078.6	78952.1
421_hexane	126941	130219	125007	132713	136476	126490	127320	125542
E. Normalizaton by peak heights of the signals related to oleic acid (m/z 419.16), extraction from aqueous lyzates
Sample	1_R	2_R	3_R	4_R	1_S	2_s	3_S	4_S
Class/Name	R	R	R	R	S	S	S	S
363_hexane	1433.13	1392.4	1283.25	1284.26	1593.96	1571.04	1464.02	1481.42
365_hexane	4586.76	4676.59	4443.55	4351.08	5903.13	5634.99	5229.61	5108.79
377_hexane	2117.26	2162.78	1920.9	1839.14	2438.43	2327.6	2221.45	2208.75
379_hexane	7237.53	6920.34	6717.26	6470.83	8294.49	8481.75	7793.36	7707.52
391_hexane	25582.9	25877.4	25148.6	24671.6	29342.1	28578.4	26961.5	26915.7
393_hexane	40930.2	40311.1	40779.3	38520.8	42277.1	42655.9	41177.3	40840.4
417_hexane	26805	25941.1	27523.4	26492.4	26693.9	26590.5	26589.4	26316.3
419_hexane	78113.8	78113.8	78113.8	78113.8	78113.8	78113.8	78113.8	78113.8
421_hexane	125655	126992	123656	124010	139393	130530	127134	123865
F. Normalizaton by total ion current (TIC) , extraction from aqueous lyzates
Sample	1_R	2_R	3_R	4_R	1_S	2_s	3_S	4_S
Class/Name	R	R	R	R	S	S	S	S
363_hexane	1263.22	929.677	1623.26	1156.79	1536.77	1702.77	1547.21	1251.09
365_hexane	4085	3136.53	5646.98	3922.53	5749.58	6110.99	5517.77	4303.45
377_hexane	1881.2	1439.83	2440.74	1657.26	2364.14	2528.72	2345.99	1861.63
379_hexane	6451.52	4677.81	8545.2	5827.67	8092.76	9211.57	8261.46	6501.24
391_hexane	22992.3	17447.4	31985.5	22402.4	28548.4	31151.6	28447	22805.4
393_hexane	36339.6	27140.8	51961.2	34588.2	41173.5	46297.3	43451.9	34450.3
417_hexane	23964.2	17376.6	35042.5	23828.7	25870.3	28871.9	27956.4	22278.1
419_hexane	69774.9	52192.7	99351.8	70274.9	75595.5	84969.8	82017.8	66000.4
421_hexane	112559	84355.9	156510	111843	133661	142202	132570	104676
